# Supplementary material
Source: PubMed Central journal article supplement (PMC6056228)
Supplement: kccy-17-07-1456295-s001.pdf [file kccy-17-07-1456295-s001.pdf]

Queries are marked in the margins of the proofs, and you can also click the hyperlinks below.

Content changes made during copy-editing are shown as tracked changes. Inserted text is in **red font** and revisions have a blue indicator. Changes can also be viewed using the list comments function. To correct the proofs, you should insert or delete text following the instructions below, but **do not add comments to the existing tracked changes**.

## AUTHOR QUERIES

### General points:

1. **Permissions:** You have warranted that you have secured the necessary written permission from the appropriate copyright owner for the reproduction of any text, illustration, or other material in your article. Please see <http://journalauthors.tandf.co.uk/permissions/usingThirdPartyMaterial.asp>.
2. **Third-party content:** If there is third-party content in your article, please check that the rightsholder details for re-use are shown correctly.
3. **Affiliation:** The corresponding author is responsible for ensuring that address and email details are correct for all the co-authors. Affiliations given in the article should be the affiliation at the time the research was conducted. Please see <http://journalauthors.tandf.co.uk/preparation/writing.asp>.
4. **Funding:** Was your research for this article funded by a funding agency? If so, please insert ‘This work was supported by <insert the name of the funding agency in full>’, followed by the grant number in square brackets ‘[grant number xxxx]’.
5. **Supplemental data and underlying research materials:** Do you wish to include the location of the underlying research materials (e.g. data, samples or models) for your article? If so, please insert this sentence before the reference section: ‘The underlying research materials for this article can be accessed at <full link>/ description of location [author to complete]’. If your article includes supplemental data, the link will also be provided in this paragraph. See <<http://journalauthors.tandf.co.uk/preparation/multimedia.asp>> for further explanation of supplemental data and underlying research materials.
6. The **CrossRef database** ([www.crossref.org/](http://www.crossref.org/)) has been used to validate the references. Resulting changes are tracked in **red font**.

- Q1.** Au: Please note that the ORCID has/have been created from information provided through CATS. Please correct if this is inaccurate.
- Q2.** Au: Please confirm you have submitted your publication costs form. PLEASE NOTE: You must provide the correct Billing Address as well as a Contact Email Address to ensure prompt and accurate delivery of your invoice.
- Q3.** Au: Please provide revised date as per journal style.
- Q4.** Au: You have not included an Acknowledgement section. Please either supply one with your corrections or confirm that you do not wish to include one.
- Q5.** Au: Please note that the Funding section(s) has/have been created from information provided through CATS. Please correct if this is inaccurate.
- Q6.** Au: The CrossRef database ([www.crossref.org/](http://www.crossref.org/)) has been used to validate the references. Mismatches between the original manuscript and CrossRef are tracked in red font. Please provide a revision if the change is incorrect.
- Q7.** Au: Please provide missing volume number for the “[7]” references list entry.
- Q8.** Au: Please provide missing volume number/issue number/page numbers for the “[34]” references list entry.
- Q9.** Au: Please provide missing volume number for the “[41]” references list entry.

## RESEARCH ARTICLE

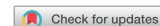

## DNA repair and cell cycle checkpoint defects in a mouse model of 'BRCAness' are partially rescued by 53BP1 deletion

Q2 Q1

Sarah M. Misenko , Dharm S. Patel , Joonyoung Her  and Samuel F. Bunting 

Q3 5 Department of Molecular Biology and Biochemistry, Rutgers, The State University of New Jersey, Piscataway, NJ, USA

**ABSTRACT**

'BRCAness' is a term used to describe cancer cells that behave similarly to tumors with *BRCA1* or *BRCA2* mutations. The BRCAness phenotype is associated with hypersensitivity to chemotherapy agents including PARP inhibitors, which are a promising class of recently-licensed anti-cancer treatments. This hypersensitivity arises because of a deficiency in the homologous recombination (HR) pathway for DNA double-strand break repair. To gain further insight into how genetic modifiers of HR contribute to the BRCAness phenotype, we created a new mouse model of BRCAness by generating mice that are deficient in BLM helicase and the Exo1 exonuclease, which are involved in the early stages of HR. We find that cells lacking BLM and Exo1 exhibit a BRCAness phenotype, with diminished HR, and hypersensitivity to PARP inhibitors. We further tested how 53BP1, an important regulator of HR, affects repair efficiency in our BRCAness model. We find that deletion of *53BP1* can relieve several of the repair deficiencies observed in cells lacking BLM and Exo1, just as it does in cells lacking *BRCA1*. These results substantiate the importance of BRCAness as a concept for classification of cancer cases, and further clarify the role of 53BP1 in regulation of DNA repair pathway choice in mammalian cells.

10

**ARTICLE HISTORY**

Received 29 November 2017  
Revised 13 April 2018  
Accepted 17 March 2018

**KEYWORDS**

DNA Repair; 53BP1; G<sub>2</sub>M checkpoint; ionizing radiation

**Introduction**

15 In recent years, a number of compounds forming a new generation of anti-cancer chemotherapy agents, the PARP inhibitors, have been licensed for clinical use [1]. These molecules inhibit the normal activity of poly(ADP-ribose) polymerase (PARP), an enzyme that modifies proteins in the vicinity of DNA damage sites by addition of chains of ADP-ribose monomers. PARP inhibitors produce a significant increase in the rate of DNA double-strand break (DSB) formation. These DSBs can normally be repaired by cellular DNA repair activities, but cells which are deficient in DSB repair are hypersensitive to PARP inhibition, leading to cell death in the presence of PARP inhibitors. Cells from tumors carrying *BRCA1* or *BRCA2* mutations are especially sensitive to PARP inhibitors, because the homologous recombination (HR) pathway for DSB repair is deficient in these cells [2,3]. PARP inhibitors were therefore originally licensed for treatment of patients with *BRCA1/2*-associated ovarian cancer.

Other mutations affecting components of DNA repair pathways also confer PARP inhibitor hypersensitivity. The term 'BRCAness' has been used to describe a deficiency in HR and PARP inhibitor hypersensitivity, as is observed with *BRCA1/2*-deficiency [4,5]. By identifying additional genetic signatures associated with 'BRCAness' in cancer cells, it may be possible to expand the range of cases that can be treated using PARP inhibitor therapy. Estimates for the proportion of tumors that may exhibit 'BRCAness' reach as high as ~50% for incidences

of ovarian carcinoma [6]. One challenge to expanding the range of clinical cases that can be treated with PARP inhibitors is in predicting which tumors are likely to exhibit 'BRCAness'. BRCAness is generally defined as a deficiency in HR, but the exact contribution of different genetic modifiers of HR in mammalian cells is not fully understood. *BRCA1* has also been reported to have roles in other cellular processes, such as regulation of gene expression, which may contribute to the particular repair deficiencies seen in *BRCA1*-deficient cells [7–9].

One important regulator of HR is p53-Binding Protein 1 (53BP1), which was originally identified as an interacting partner of p53, but which has subsequently been revealed to have a role in repair of DSBs [10]. 53BP1 is recruited to chromatin in the vicinity of DSBs, based on the interaction of its Tudor domain and Ubiquitin Dependent Region with modified histones [11,12]. We previously observed that deletion of the *53bp1* gene in *Brcal*-deficient mice largely rescues the pathological effects of *Brcal* loss-of-function [13–15]. In particular, embryonic lethality associated with homozygous loss of *Brcal*, or tumor susceptibility arising in cells with conditional knockout of *Brcal*, are both rescued by co-deletion of *53bp1*. Based on measurements of altered HR efficiency in *Brcal/53bp1* double-knockout cells, we showed that 53BP1 affects survival of *Brcal*-deficient cells by limiting the efficiency of HR. Other genetic modifiers of HR efficiency in *Brcal*-deficient cells, including *REV7* and *Polθ*, have subsequently been identified [16,17].

**CONTACT** Samuel F. Bunting  [bunting@cabm.rutgers.edu](mailto:bunting@cabm.rutgers.edu)  Center for Advanced Biotechnology and Medicine Room 337, Rutgers, The State University of New Jersey, 679 Hoes Lane West, Piscataway, NJ 08854, USA.

 Supplemental data for this article can be accessed at  <http://dx.doi.org/10.1080/15384101.2018.1456295>.

© 2018 Informa UK Limited, trading as Taylor & Francis Group

According to current models, 53BP1 regulates the ability of cells to perform HR at least in part by modulating the extent of resection at DSBs [10,18]. Resection involves processing of a blunt DSB by nuclease activity on the 5' ends of the DNA fragments, producing 3' single-stranded DNA overhangs. The single-stranded DNA regions formed by DSB resection are bound by replication protein A (RPA) and subsequently by RAD51 and its paralogs, forming a recombinogenic nucleoprotein filament [7]. The nucleoprotein filament can pair with a homologous DNA sequence, such as homologous sequence on a sister chromatid, leading to formation of a Holliday Junction and template-based repair of the DSB by HR. We proposed that BRCA1 is necessary to overcome a blocking effect of 53BP1 on DSB resection, and BRCA1-deficient cells have a defect in HR because they cannot overcome this inhibitory effect [14,19]. In the absence of 53BP1, *Brca1/53bp1* double-knockout cells grow relatively normally, because the requirement for BRCA1 is relieved. This model is supported by several lines of evidence indicating that DSB resection is increased in the absence of 53BP1 [13,14,20,21]. On the other hand, this model also predicts that DSB resection should be deficient in *Brca1*-deficient cells when 53BP1 is present, but the evidence for a block in DSB resection associated with loss of BRCA1 is inconclusive [8,22]. Using a modified DNA combing assay, Cruz-Garcia et al demonstrated that the normal pace of DSB resection requires the interaction of BRCA1 and CtIP, although the BRCA1-CtIP interaction is not absolutely essential for resection to proceed [23–25]. A cellular system to measure resection at AsiSI endonuclease cut sites also showed no evidence of a defect in resection after BRCA1 knockdown [26]. In our own studies, we have observed no obvious defect in RPA loading at DSB sites induced by ionizing radiation (IR) in *Brca1*-deficient cells [27].

To better understand the effect of 53BP1 in controlling DSB repair in cells with deficient HR, we have generated a mouse model of 'BRCAness', in which DSB resection is predicted to be deficient. The exonuclease, EXO1, and the RECQ helicase, BLM, have been reported to function in parallel pathways for 'long-range' resection of DSBs [28–30]. Using *Exo1*<sup>-/-</sup> mice in which *Blm* is conditionally-inactivated, we have generated cells that lack long-range resection activity, and exhibit 'BRCAness', as demonstrated by PARP inhibitor hypersensitivity and reduced markers of HR. Co-deletion of the *53bp1* gene is sufficient to substantially rescue HR and partially relieves the cell growth defect of cells lacking both BLM and EXO1. *53bp1* deletion does not cause a significant increase in DSB resection in our 'BRCAness' cell model, however, supporting the idea that the effect of 53BP1 in regulating HR depends on other factors in addition to regulation of resection.

## Results

### Generation of a 'BRCAness' mouse model by deletion of *Blm* and *Exo1*

Repair of DSBs by HR requires DSB resection, which proceeds by an initial Mre11/CtIP-dependent step followed by 'long-range' resection of the DSB by the exonuclease, EXO1, and a

complex of BLM/Dna2[7,28–30]. We reasoned that combined targeting of *Exo1* and *Blm* would cause a defect in DNA double-strand break repair, and PARP inhibitor hypersensitivity, by limiting DSB resection. We therefore crossed *Exo1*<sup>+/-</sup> mice [31] to *Blm*<sup>fl/fl</sup> mice [32], which carry a conditional allele of *Blm*. Deletion of the *Blm*<sup>fl/fl</sup> alleles to generate *Blm*<sup>Δ/Δ</sup> cells was achieved by breeding to *CD19-Cre* knockin mice, which express Cre recombinase in the B lymphocyte lineage only [33]. Primary *Blm*<sup>Δ/Δ</sup> *Exo1*<sup>-/-</sup> B cells were isolated from the spleens of appropriate mice, and placed in culture with LPS to induce cell proliferation. After two days of cell growth, we treated the cells either with olaparib, a PARP inhibitor, or mitomycin C (MMC), which produces interstrand DNA crosslinks. Following drug treatment, genomic instability was measured in the different genotypes using telomere PNA-FISH to reveal chromosomal abnormalities in metaphase spreads (Figure 1A) [34]. Although single-knockout *Blm*<sup>Δ/Δ</sup> or *Exo1*<sup>-/-</sup> metaphase spreads did not show substantial olaparib or MMC sensitivity, *Blm*<sup>Δ/Δ</sup> *Exo1*<sup>-/-</sup> double-knockout B cells showed a significantly higher rate of chromosome aberrations after drug exposure (Figure 1B–D). *Blm*<sup>Δ/Δ</sup> *Exo1*<sup>-/-</sup> cells therefore appear to exhibit features of 'BRCAness'.

### Deletion of 53bp1 rescues genomic instability in *Blm*<sup>Δ/Δ</sup> *Exo1*<sup>-/-</sup> Model of 'BRCAness'

As *53bp1* deletion rescues many phenotypes of *Brca1*-deficient cells [14,35], we tested the contribution of 53BP1 to DNA repair efficiency in cells exhibiting 'BRCAness' by crossing *Blm*<sup>Δ/Δ</sup> *Exo1*<sup>+/-</sup> to *53bp1*<sup>-/-</sup> mice to generate *Blm*<sup>Δ/Δ</sup> *Exo1*<sup>-/-</sup> *53bp1*<sup>-/-</sup> 'triple-knockout' B cells. Despite deletion of these three repair factors, we found that the triple-knockout cells did not show a significant growth defect relative to WT. Interestingly, co-deletion of *53bp1* was sufficient to achieve a significant reduction in the frequency of chromosome aberrations in *Blm*<sup>Δ/Δ</sup> *Exo1*<sup>-/-</sup> cells treated with either olaparib or MMC (Figure 1A–C). This result indicates that *53bp1* deletion can result in an improvement in genomic integrity in certain genetic backgrounds associated with 'BRCAness', as has previously been observed in *Brca1*-deficient cells.

To test the impact of combined deletion of *Blm* and *Exo1* on cell growth in the presence of PARP inhibitors, we performed a CFSE dilution assay, which measures the ability of B cells to undergo cell division in vitro. Consistent with the chromosome instability results, olaparib treatment caused a significant reduction in the ability of *Blm*<sup>Δ/Δ</sup> *Exo1*<sup>-/-</sup> B cells to proliferate in vitro (Figure 1E and F). *Blm*<sup>Δ/Δ</sup> *Exo1*<sup>-/-</sup> *53bp1*<sup>-/-</sup> cells proliferated slightly less than WT or single-knockout cells, but this difference did not rise to the level of statistical significance. Together, these results support the idea that genomic instability arising with deletion of long-range resection activities leads to reduced cell growth. The presence of 53BP1 contributes significantly to the repair deficiencies of the BRCAness cells.

We measured levels of phosphorylated Kap1 in cells lacking BLM, EXO1 or 53BP1 after ionizing radiation, but did not find any substantial differences between the various genotypes (Figure S1A). This result suggests that phenotypes of BLM/EXO1-deficient cells are not dependent on reduced ATM signaling. We also measured class switch recombination of B

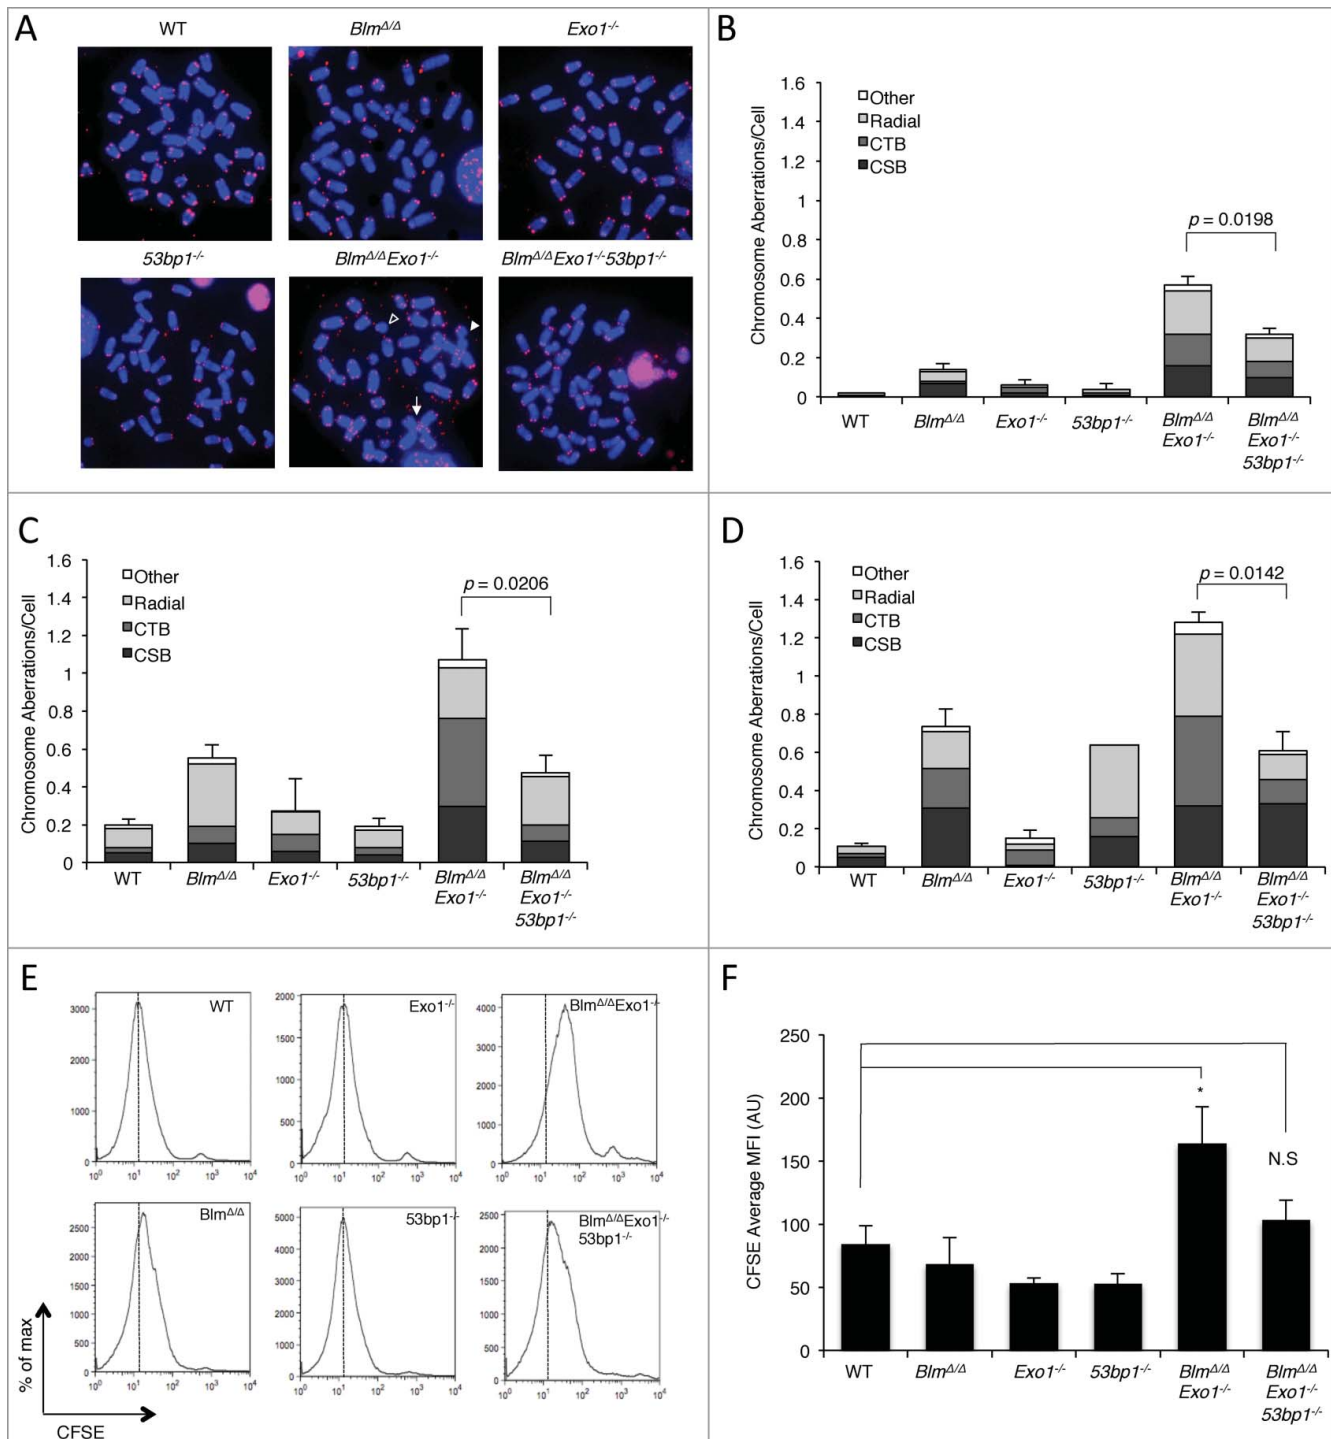

**Figure 1.** Deletion of 53BP1 restores genomic integrity and cell proliferation in *Blm*<sup>ΔΔ</sup>*Exo1*<sup>-/-</sup> B cells.

(A) Metaphase spreads from primary B lymphocytes. Chromosomes are stained with DAPI (blue) and telomere labeled with Cy3-PNA probe (red). Arrow indicates radial chromosome, open triangle indicates chromosome break (CSB), solid triangle indicates chromatid break (CTB). Quantification of chromosome aberrations from cells after: (B) No treatment (C) Olaparib treatment (2  $\mu$ M, 18 hrs) (D) Mitomycin C treatment (250 nM, 18 hrs). Error bars show s.d. in each case. P values calculated using 2-tailed Student T test. N = 3 or more for each sample. (E) Flow cytometry CFSE staining profiles of B cells of indicated genotypes after 72 hrs growth in vitro. CFSE signal is lowest in cells that divided the most during the experiment. Dashed line indicates maximum peak height for WT. (F) Quantification of CFSE assay, showing the average mean fluorescence intensity of CFSE in cells of the indicated genotypes. Lower values for CFSE signal indicate more cell division during the experiment. Error bars show s.e.m. N = 2 - 7. Statistical significance scored using 2-tailed Student T test, with  $P < 0.05$  taken as statistically significant (\*).

lymphocytes lacking BLM, EXO1 or 53BP1 (Fig S1B-C). As expected, 53BP1<sup>-/-</sup> cells showed a substantial defect in class switching to IgG1, and this rate was further lowered by combined deletion of BLM and EXO1. Targeting resection activities therefore does not rescue the class switch recombination phenotype of 53BP1<sup>-/-</sup> cells.

### 53BP1 blocks homologous recombination in cells lacking long-range resection activities

Next, we tested whether the genomic instability phenotype of *Blm*<sup>ΔΔ</sup>*Exo1*<sup>-/-</sup> cells was associated with a defect in homologous recombination. First, we quantified the appearance of

nuclear foci of RAD51, a key component of the HR pathway, at IR-induced DNA damage sites (Figure 2A and B). RAD51 foci are dependent on DSB resection, and deletion of resection factors, such as CtIP, reduces RAD51 foci formation [24]. *Blm*<sup>Δ/Δ</sup>

*Exo1*<sup>-/-</sup> cells showed a significant defect in accumulation of RAD51 foci, which was more pronounced than the defect evident in cells that were deficient in either *Blm* or *Exo1* individually. The genomic instability observed in the double-mutant

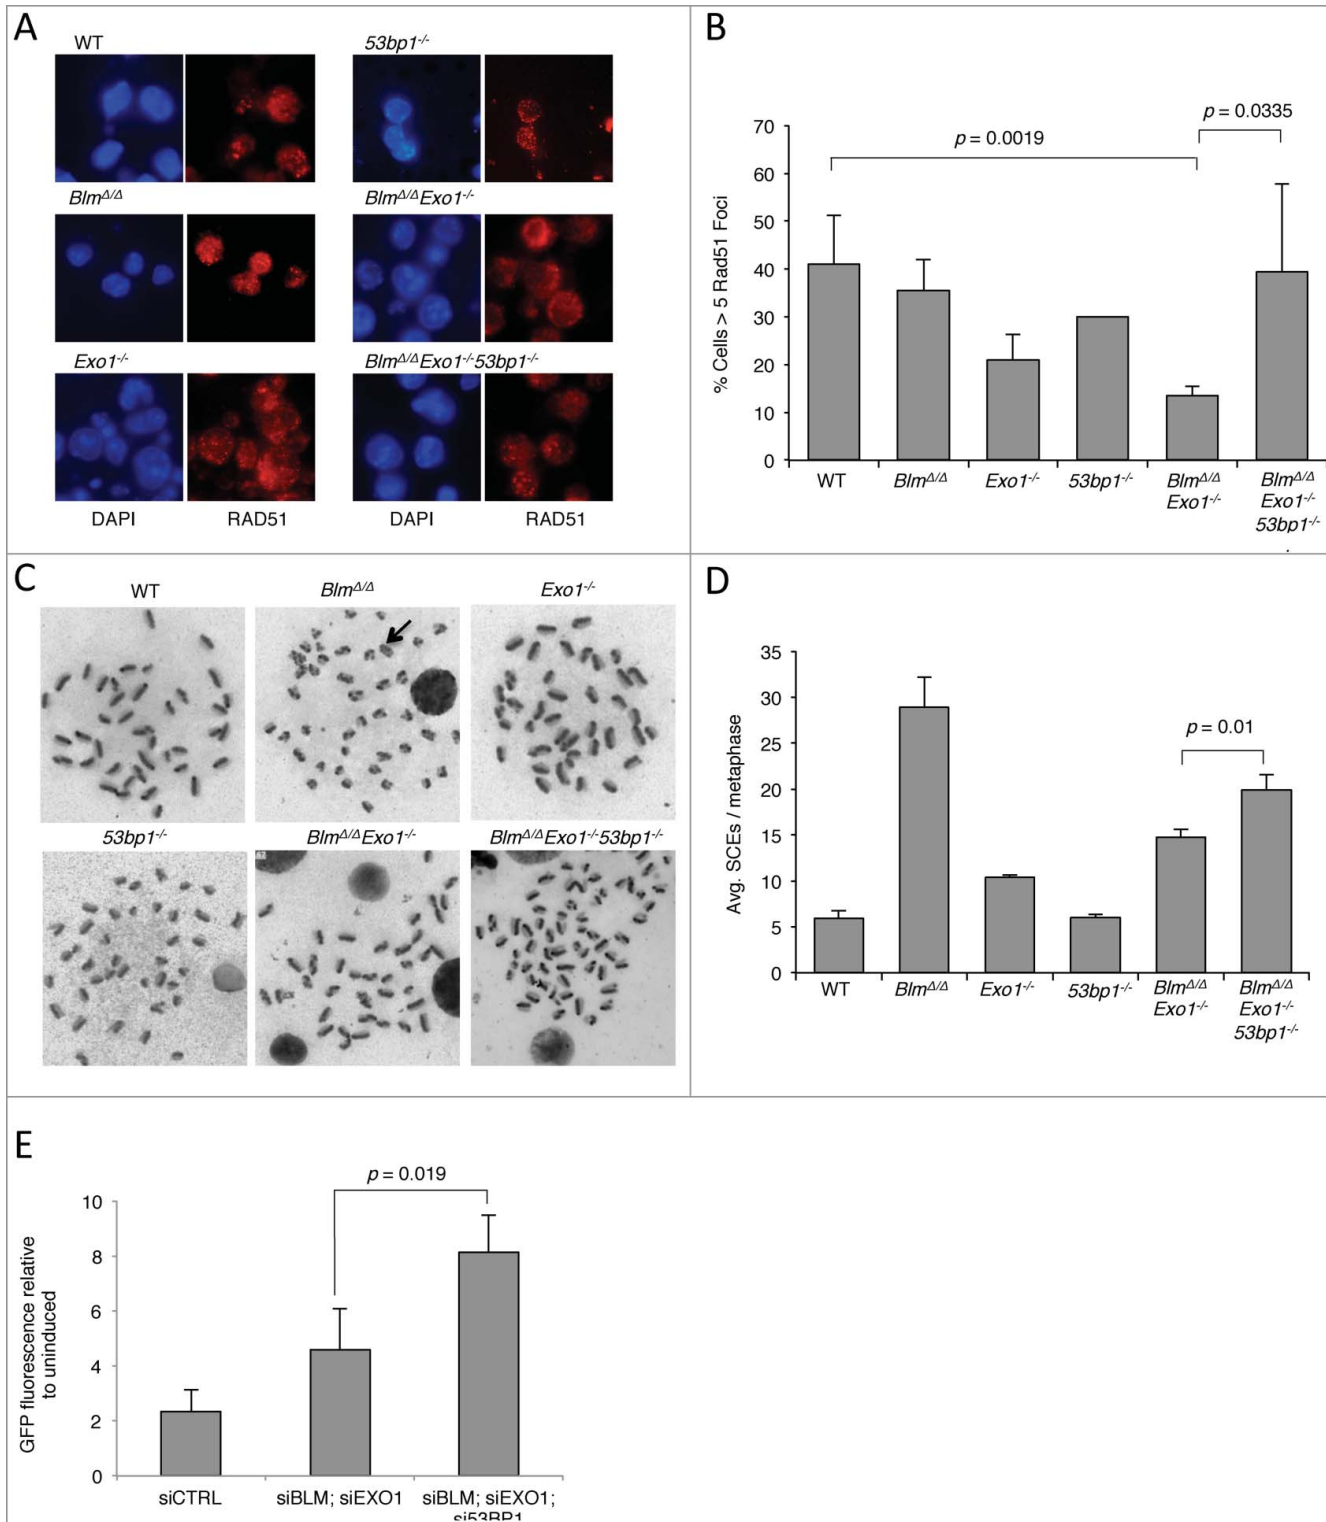

**Figure 2.** Deletion of 53BP1 restores HR in BLM and EXO1 double-deficient cells.

(A) Immunofluorescence of RAD51 foci (red) in B lymphocytes fixed after 10 Gy ionizing radiation + 4 hour recovery. DAPI staining (blue) was used as DNA counterstain. (B) Quantification of the percentage of cells with >5 RAD51 foci per cell. (C) Sister chromatid exchange assay from primary B lymphocytes grown in BrdU for 48 hours and treated (18 hrs) with 2  $\mu$ M olaparib. Metaphase spreads were differentially labeled using Hoechst-33342 and Giemsa stain. The arrow indicates a chromosome from a *Blm*<sup>Δ/Δ</sup> cells showing a high rate of chromatid exchanges. (D) Quantification of average sister chromatid exchanges per cell. Error bars show s.d. P values calculated using 2-tailed Student T test. N = 3. (E) Measurement of HR by U2OS EJ-DR reporter assay. I-SceI-mediated DNA double-strand breaks were induced in cells treated with siRNA oligos as shown and GFP<sup>+</sup> cells were detected by flow cytometry. For siCTRL, N = 6, for siBLM;siEXO1, N = 7, for siBLM;siEXO1; si53BP1, N = 2.

200 cells therefore correlates with a defect in HR, consistent with  
the known role of BLM and EXO1 in long-range resection of  
DSBs during HR-mediated repair. When *53bp1* was also  
deleted, to make *Blm<sup>Δ/Δ</sup> Exo1<sup>-/-</sup> 53bp1<sup>-/-</sup>* B cells, we found  
that RAD51 foci were substantially restored relative to *Blm<sup>Δ/Δ</sup>*  
205 *Exo1<sup>-/-</sup>* cells. This result suggests that the improved genomic  
integrity and cell growth after olaparib treatment observed  
with co-deletion of *53bp1* in *Blm<sup>Δ/Δ</sup> Exo1<sup>-/-</sup>* cells is related  
to improved HR. This result is similar to that seen with  
*Brcal<sup>Δ11/Δ11</sup>* cells, which show genomic instability and reduced  
210 cell growth after PARP inhibitor treatment that can be reversed  
by co-deletion of *53bp1* [14,15,35]. Using knockdown of BLM,  
EXO1 and 53BP1 in U2OS osteosarcoma cells, we were further-  
more able to show that of deletion of these factors gave an  
equivalent effect on RAD51 foci formation in human cells  
215 (Fig S2A-C).

As a second measure of HR, we assayed the frequency of sister  
chromatid exchanges in B cells after overnight treatment  
with the PARP inhibitor, olaparib. Sister chromatid exchanges  
form as a result of crossover HR involving homologous sequen-  
220 ces on sister chromatids in late S/G<sub>2</sub> phase. As such, the rate of  
sister chromatid exchanges can be used as a measure of one  
product of HR [36]. *Blm<sup>Δ/Δ</sup>* cells are known to have a high rate  
of sister chromatid exchanges, because BLM mediates an alter-  
native pathway leading to non-crossover resolution of HR  
225 intermediates (Figure 2C and D) [7,37]. We nonetheless found  
that *Blm<sup>Δ/Δ</sup> Exo1<sup>-/-</sup>* cells show significantly lower rates of sister  
chromatid exchanges relative to *Blm<sup>Δ/Δ</sup>* cells, suggesting  
that in the absence of long-range DSB resection, the high rates  
of crossover HR normally seen in *Blm<sup>Δ/Δ</sup>* cells cannot be sus-  
230 tained. This result points to a reduced rate of HR in *Blm<sup>Δ/Δ</sup>*  
*Exo1<sup>-/-</sup>* cells. The rate of SCEs is increased in *Blm<sup>Δ/Δ</sup> Exo1<sup>-/-</sup>*  
*53bp1<sup>-/-</sup>* B cells (Figure 2D), again demonstrating that 53BP1  
exerts a block on HR in the *Blm<sup>Δ/Δ</sup> Exo1<sup>-/-</sup>* model of 'BRCA-  
ness'. These results are reminiscent of observations made upon  
235 co-deletion of *53bp1* in *Brcal<sup>Δ11/Δ11</sup>* cells. We also found that  
deletion of *53bp1* increases the rate of SCEs in *Blm<sup>Δ/Δ</sup>* B cells,  
as has previously been found using knockdown approaches in  
BLM-deficient cells [38]. As a third measure of HR, we used  
EJ-DR reporter cells, which express GFP following HR-medi-  
240 ated repair of induced I-SceI-mediated DSBs (Figure 2E).  
Knockdown of 53BP1 correlated with a higher frequency of HR  
in cells treated with siBLM and siEXO1 oligos, indicating that  
53BP1 restricts the use of HR in cells lacking key DSB resection  
factors.

#### 245 **Reduced DSB resection in mouse 'BRCAness' model**

To test whether the reduced genomic integrity and HR effi-  
ciency of our *Blm<sup>Δ/Δ</sup> Exo1<sup>-/-</sup>* cells was related to reduced DSB  
resection in these cells, we used a flow cytometry approach to  
detect RPA bound at single-stranded DNA regions (Figure 3A)  
250 [39]. RPA loading in this assay is linked to single-stranded  
DNA regions that arise during replication in S phase, and also  
single-stranded DNA that is formed at break sites through  
resection in the late S and G<sub>2</sub> phases of the cell cycle. By quanti-  
fying RPA staining in late S and G<sub>2</sub> phase cells, we were able to  
255 discern an increase in RPA intensity following DNA damage  
in WT cells, consistent with an increase in DSB resection

(Figure 3B and C). RPA intensity following DNA damage  
was not substantially reduced relative to the WT in *Blm<sup>Δ/Δ</sup>*,  
*Exo1<sup>-/-</sup>* or *53bp1<sup>-/-</sup>* single-knockout cells. RPA intensity was  
significantly reduced, however, in *Blm<sup>Δ/Δ</sup> Exo1<sup>-/-</sup>* double- 260  
knockout cells. This result demonstrates that in primary B cells,  
normal DSB resection is dependent on redundant contributions  
from both BLM and EXO1, as has been seen previously using  
knockdowns in cell line models [28]. The defect in DSB resec-  
tion in double-knockout cells correlates with and likely 265  
accounts for the defective HR and repair phenotypes observed  
in these cells. We hypothesized that co-deletion of 53BP1  
would rescue the resection defect evident in *Blm<sup>Δ/Δ</sup> Exo1<sup>-/-</sup>*  
cells. Surprisingly, in *Blm<sup>Δ/Δ</sup> Exo1<sup>-/-</sup> 53bp1<sup>-/-</sup>* cells, the  
rate of resection was not significantly different from *Blm<sup>Δ/Δ</sup>* 270  
*Exo1<sup>-/-</sup>* cells. This result suggests that rescue of genomic integ-  
rity by deletion of 53BP1 from *Blm<sup>Δ/Δ</sup> Exo1<sup>-/-</sup>* cells may not  
require a large increase in DSB resection.

As a second measure of DSB resection in cells lacking BLM,  
EXO1 and 53BP1, we applied native BrdU immunofluores- 275  
cence to measure exposed single-stranded DNA regions after  
ionizing radiation-induced DNA damage [13]. After knock-  
down of BLM, EXO1 and/or 53BP1, cells were grown for  
48 hrs in BrdU medium. Following DNA damage, BrdU  
exposed at resected DNA break sites was detected using an 280  
anti-BrdU antibody and flow cytometry (Figure S3). Using this  
approach, we were able to detect an increase in exposed single-  
stranded DNA, consistent with DSB resection, in control cells  
and cells with single knockdown of BLM, EXO1 or 53BP1, fol-  
285 lowing ionizing radiation. Cells with combined knockdown of  
BLM and EXO1, or 'triple-knockdown cells' lacking BLM,  
EXO1 and 53BP1, did not show an equivalent increase in  
exposed BrdU signal, indicating that resection is defective in  
these cells (Figure 3D). This result is consistent with our find-  
290 ings using RPA FACS, which showed that deletion of 53BP1  
does not cause an increase in resection sufficient to be detected  
by these methods.

#### **Lack of long-range DSB resection activities leads to defective G<sub>2</sub>M checkpoint**

In addition to a defect in HR, *Brcal*-deficient cells show defec- 295  
tive cell cycle checkpoints [40]. The G<sub>2</sub>M checkpoint normally  
prevents entry of cells carrying chromosome breaks into mito-  
sis, and is induced by DNA damage signaling involving ATM-  
Chk2 or ATR-Chk1 [41]. The activation of the ATR-Chk1 sig-  
naling axis requires association of the ATR kinase with its part- 300  
ners, TOPBP1 or ETAA1, at RPA-bound single-stranded DNA  
regions [42]. RPA loading requires resection, and defects in  
DSB resection, such as that caused by deletion of CtIP, reduce  
ATR activation and lead to a failure of the G<sub>2</sub>M checkpoint  
[43,44]. To test if the reduced DSB resection that we observed 305  
in *Blm<sup>Δ/Δ</sup> Exo1<sup>-/-</sup>* B cells is associated with a defect in signal-  
ing pathways leading to induction of the G<sub>2</sub>M checkpoint, we  
measured the proportions of mitotic cells after DNA damage  
induced by ionizing radiation. We found that deletion of either  
*Blm* or *Exo1* singly does not cause a significant G<sub>2</sub>M checkpoint 310  
defect, but combined deletion of *Blm* and *Exo1* caused a  
failure in the G<sub>2</sub>M checkpoint (Figure 4A and B). To test if  
*53bp1* deletion modified the G<sub>2</sub>M checkpoint defect of

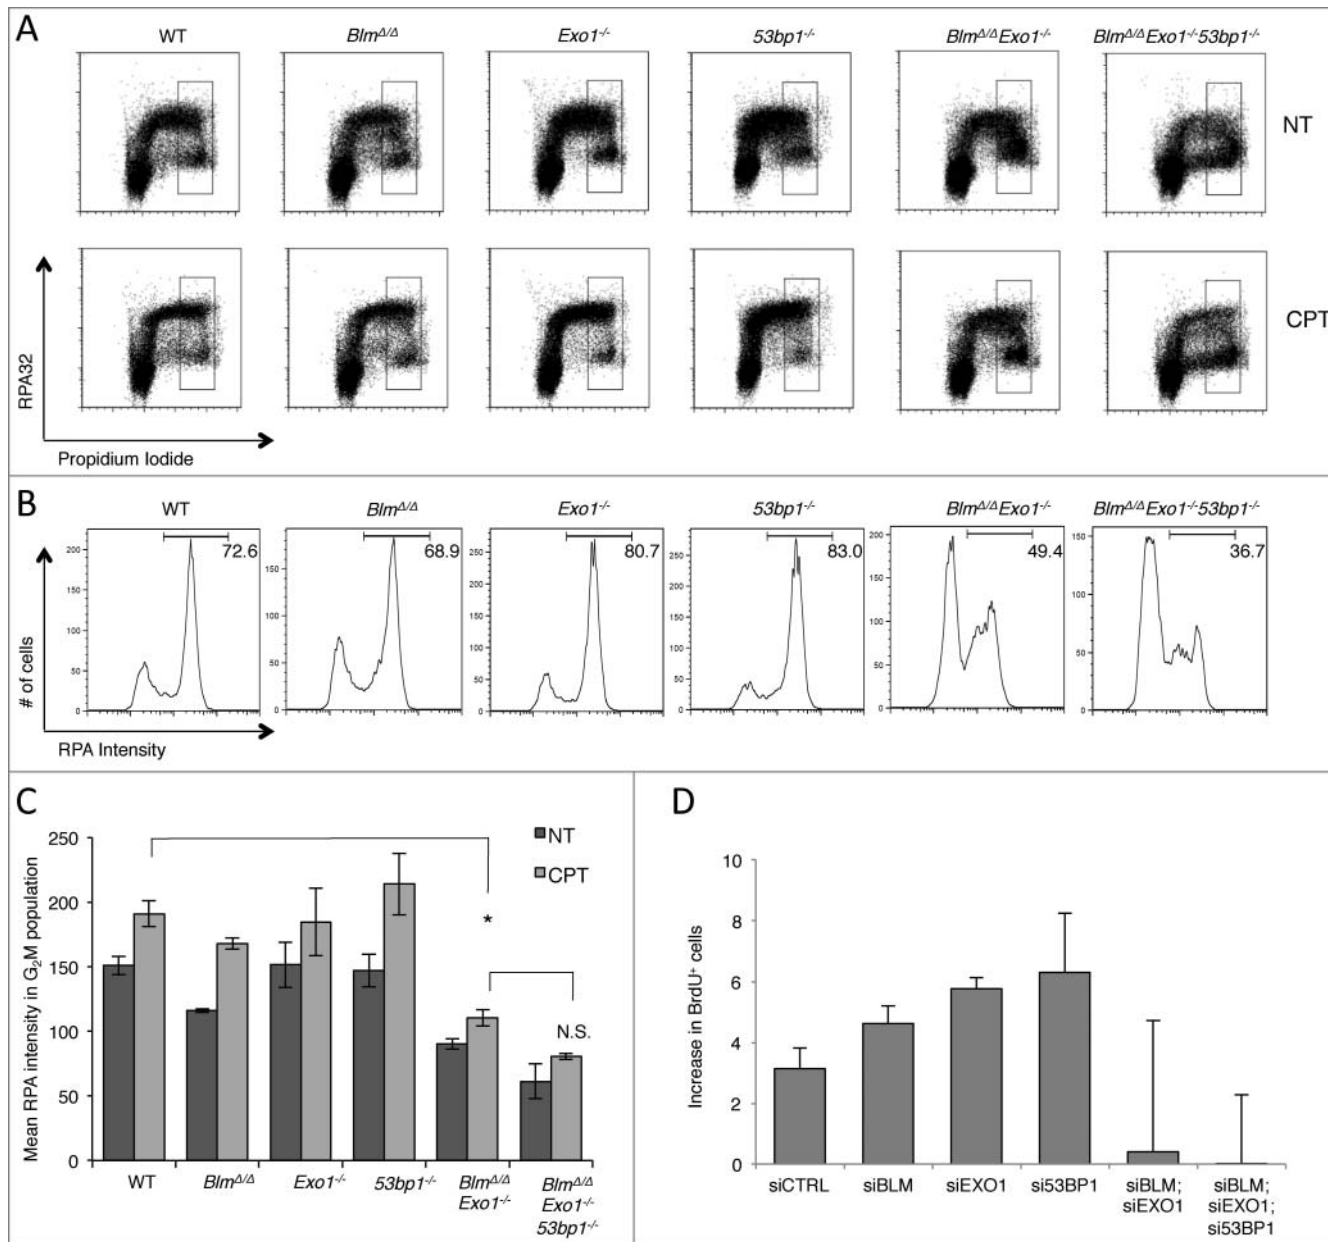

**Figure 3.** Measurement of DSB resection by BLM and EXO1 in the absence of 53BP1.

(A) Detection of chromatin-bound RPA at different phases of the cell cycle. Ex vivo B-lymphocytes were either not treated (NT) or treated with 1  $\mu$ M camptothecin (CPT) for 1 hour, then fixed and stained with propidium iodide (to measure DNA content) and anti-RPA32 antibody. Late S phase / G<sub>2</sub> / M phase cells were selected for further analysis (gated population). (B) Quantification of RPA intensity in CPT-treated late S/G<sub>2</sub>-phase cells. Gated populations from (A) were further analyzed to identify the proportion of cells staining strongly for RPA (indicates resection). RPA staining was higher in WT cells and reduced in *Blm*<sup>ΔΔ</sup>*Exo1*<sup>-/-</sup> cells. (C) Graph of average mean fluorescent intensity of RPA staining in cells of the indicated genotypes in late S/G<sub>2</sub> phase. Error bars indicate s.d. Statistical significance scored using 2-tailed Student T test, with  $P < 0.05$  taken as statistically significant (\*).  $N = 3$ . (D) Quantification of resection by native BrdU immunofluorescence and flow cytometry. Cells treated with the siRNA oligos as shown were grown in BrdU, irradiated (30Gy, 2hrs recovery) and stained for BrdU at exposed single-stranded DNA regions. Mean increase in BrdU<sup>+</sup> population is shown in each case.  $N = 2$ . Error bars represent standard deviation.

*Blm*<sup>ΔΔ</sup> *Exo1*<sup>-/-</sup> cells, we also tested *Blm*<sup>ΔΔ</sup> *Exo1*<sup>-/-</sup> *53bp1*<sup>-/-</sup> cells after IR treatment. *53bp1* deletion did not completely reverse the G<sub>2</sub>M checkpoint defect of *Blm*<sup>ΔΔ</sup> *Exo1*<sup>-/-</sup> cells. *Blm*<sup>ΔΔ</sup> *Exo1*<sup>-/-</sup> *53bp1*<sup>-/-</sup> cells also showed a mitotic index after IR that was elevated relative to WT controls. Levels of Chk1 phosphorylation, which are indicative of ATR activation, were reduced in BLM/EXO1-deficient cells, and only partially rescued by 53BP1 deletion (Figure 4C). Taken together, this evidence suggests that 53BP1 deletion is not sufficient to completely rescue ATR activation or restore a normal G<sub>2</sub>M checkpoint defect in *Blm*<sup>ΔΔ</sup> *Exo1*<sup>-/-</sup> cells. Notably, *53bp1* deletion also does not rescue the G<sub>2</sub>M checkpoint defect of *Brca1*-deficient cells [45].

## Discussion

The concept of 'BRCAness' has been used to describe tumors that behave like *BRCA1*- or *BRCA2*-associated cancer cases by having a defect in HR and hypersensitivity to chemotherapy agents such as olaparib and cisplatin. To attempt to better test our understanding of 'BRCAness', we set out to create a mouse model that we hypothesized would show cellular phenotypes similar to those seen in cancer cells harboring *BRCA1* or *BRCA2* mutations. BLM and EXO1 have been shown to have parallel roles in 'long-range' DSB resection using biochemical approaches and in cell lines, but the importance of 'long-range' resection for HR in primary mammalian cells has not

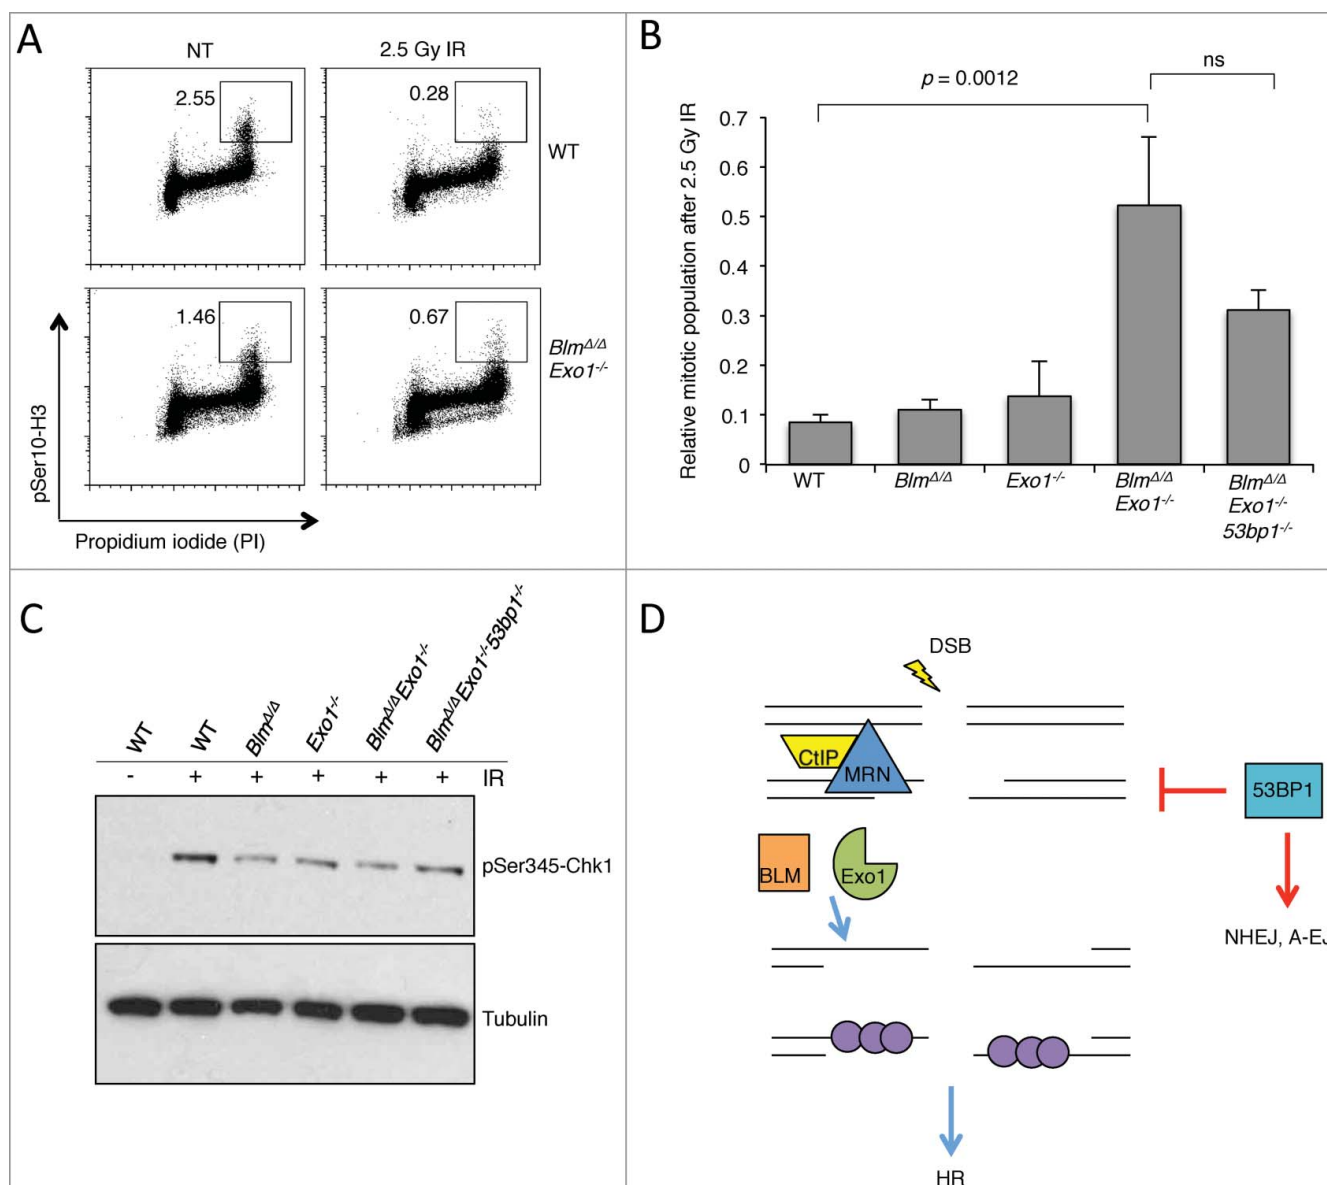

**Figure 4.** Analysis of cell cycle progression after ionizing radiation in the absence of BLM, EXO1 and 53BP1.

(A) Mitotic populations of B lymphocytes following 2.5 Gy ionizing radiation + 1-hour recovery. Cells were fixed and stained with propidium iodide (to measure DNA content) and an antibody for the mitotic chromatin signature pSer10-H3. The mitotic population is indicated. (B) Quantification of the average mitotic population after treatment with IR, normalized to the mitotic population from untreated cells.  $N = 3$ . Error bars indicate s.d. P values calculated using 2-tailed Student T test. (C) Western blot analysis of pSer345-Chk1 levels after treatment with 2.5 Gy ionizing radiation + 1-hour recovery. (D) Model for 53BP1 action in *Blm*<sup>ΔΔ</sup> *Exo1*<sup>-/-</sup> cells. 53BP1 appears to limit DSB resection mediated by CtIP-MRN during the early phases of homologous recombination, leading to genomic instability in cells lacking pro-HR activities such as BRCA1. Subsequent 'long-range' resection by BLM and Exo1 increases HR efficiency, allowing normal HR even when 53BP1 is present. 53BP1 also acts by a non-resection mechanism to promote toxic repair pathways such as classical nonhomologous end-joining (NHEJ) and alternative end-joining (A-EJ).

previously been tested [28–30]. We find that combined deletion of these factors results in a 'BRCAness' phenotype. First, *Blm*<sup>ΔΔ</sup> *Exo1*<sup>-/-</sup> cells are hypersensitive to PARP inhibition, showing elevated genomic instability and reduced cell growth after olaparib treatment. Second, they lack hallmarks of HR, such as DNA damage-induced RAD51 foci. Third, DSB resection is reduced in *Blm*<sup>ΔΔ</sup> *Exo1*<sup>-/-</sup> cells, a phenotype that may also be associated with loss of BRCA1. Finally, *Blm*<sup>ΔΔ</sup> *Exo1*<sup>-/-</sup> cells show a defect in the G<sub>2</sub>M checkpoint, as is seen in *BRCA1*- and *BRCA2*-deficient cells. These observations support the idea that *Blm*<sup>ΔΔ</sup> *Exo1*<sup>-/-</sup> cells are a valid model for 'BRCAness'.

HR initiates by an initial resection step involving CtIP and Mre11 [7]. Our data is congruent with previous studies which

show that, in the presence of 53BP1, this initial resection step is not sufficient for efficient HR [28–30]. Additional resection mediated by BLM and Exo1 appears to be essential to support normal HR-mediated repair. Several other factors have been proposed to act in long-range resection in mammalian cells, including the RECQ family helicases, WRN and RECQL4 [46–48]. Our results do not rule out the idea that these factors contribute to long-range resection, but they suggest that these additional 'long-range resection' factors cannot substitute fully for BLM and EXO1. Some level of HR is nonetheless possible in the absence of BLM and EXO1, as can be seen by the sustained rate of crossover HR events observed using the sister chromatid exchange assay. In contrast, knockdown of CtIP leads to a lower rate of SCE formation than in control cells [49]. The



initial stage of resection mediated by CtIP is therefore of more fundamental importance to HR than subsequent long-range resection by BLM and Exo1.

Our 'BRCAness' model involving combined deletion of *Blm* and *Exo1* allows us to further test the importance of 53BP1 as a factor regulating DSB repair efficiency in cells with HR defects. 53BP1 expression correlates with survival in *BRCA1*-dependent breast cancer [35,50], and 53BP1 may also be an important modulator of tumor cell survival or chemoresistance in the context of other genetic mutations. In previous work, we found that deletion of 53BP1 largely rescues the repair deficiency of *Brca1*-deficient cells, but has little or no effect in cells with deficiencies in the HR genes *Brca2*, *Palb2*, and *Xrcc2*, or the Fanconi Anemia gene, *Fancc2* [13,14,35,51]. We proposed that 53BP1 inhibits HR by reducing DSB resection. According to this model, *53bp1* deletion rescues the loss of HR in mutants in which there is a resection defect, but does not rescue the loss of HR in mutants that affect later stages of the recombination process (such as *BRCA2* or *XRCC2*). The results of the present study are partially consistent with this model. *Blm*<sup>Δ/Δ</sup> *Exo1*<sup>-/-</sup> cells showed genomic instability linked to an HR defect, which correlated with reduced DSB resection. The HR defect and genomic instability phenotype showed a significant rescue when 53BP1 was additionally deleted. Interestingly, however, we did not observe a measurable increase in DSB resection in *Blm*<sup>Δ/Δ</sup> *Exo1*<sup>-/-</sup> cells when *53bp1* was deleted (Figure 3B). This result suggests one of two possibilities (Figure 4D). First, the effect of 53BP1 on resection dynamics may be most relevant at early timepoints after DSB induction. Deletion of *53bp1* may allow the initial CtIP/Mre11-mediated stage of resection to proceed more quickly, increasing the recombinogenic potential of the DSB, even though we could not detect a difference using our RPA loading assay. Alternatively, our results may indicate that 53BP1 has an additional important role in mediating choice of DSB repair pathways besides control of DSB resection.

In recent years, several functions of 53BP1 have been identified, which may contribute to its role in regulation of repair of DSBs. 53BP1 recruits its downstream interacting partners, RIF1 and PTIP, which regulate resection and DSB joining [52–57]. PTIP associates with the endonuclease, Artemis, to cleave single-stranded DNA regions, potentially reducing the apparent rate of resection, but creating mutations by loss of DNA sequence surrounding the break site [58]. At heterochromatic regions, 53BP1 recruitment is reported to enable heterochromatin relaxation, to facilitate DNA repair [59,60]. 53BP1 antagonizes mutagenic single-strand annealing, that may occur as a consequence of extensive double-strand break resection [61]. Finally, 53BP1 also appears to contribute to DSB repair by non-homologous end-joining (NHEJ) by mediating the joining of distant DNA ends, and by increasing the mobility of DSBs within the nucleus [62–65]. These pro-NHEJ effects of 53BP1 are most likely to contribute to mutation in cells exhibiting 'BRCAness', because NHEJ has a propensity to introduce mutations at the repair junction, and to produce translocations [19].

Ultimately, understanding the exact requirements for resection leading to productive HR will require a more holistic analysis of the different factors that contribute to this process. Notably, the role of *BRCA1* in mediating resection or

displacing 53BP1 remains unclear, although recent results indicate that the E3 ubiquitin ligase activity of *BRCA1* may mediate 53BP1 repositioning [66]. Nonetheless, our results further demonstrate the usefulness of 'BRCAness' as a concept for characterization of cancer cases. Mutation or loss of expression of resection factors such as BLM and Exo1 can clearly lead to mutagenic outcomes at the cellular level, which could contribute to malignancy. Identifying these changes would allow greater use of the PARP inhibitor drug family for anti-cancer therapy.

## Methods

### Animal husbandry

All animal experiments were approved by the Institutional Animal Care and Use Committee (IACUC) at Rutgers University, protocol 12–024.

### Metaphase spreads

B cells were arrested in metaphase using 100 ng/ml of colcemid for 1 hour and fixed in 3:1 methanol:acetic acid fixative. PNA-FISH was performed as previously described [34].

### G<sub>2</sub>M cell cycle checkpoint

B cells were grown for 48 hours, treated with 2.5 Gy of ionizing radiation from a <sup>237</sup>Cs gamma source, and collected 1 hour after irradiation. B cells were fixed in 70% ethanol and permeabilized in 0.25% Triton X-100 in PBS. Cells were stained with 0.75 μg of anti-phosphoSer10- histone H3 antibody (Millipore 06–570) and a 1:200 dilution of goat anti-rabbit Alexa-488 antibody. Cells were suspended in 1 mg/ml propidium iodide and 0.1 mg of RNase A in PBS and incubated at 37°C in the dark for 30 minutes. Mitotic cells were measured using a Becton Dickinson FACSCalibur and data were analyzed by FlowJo software.

### Western blot and immunofluorescence

For western blotting, primary antibodies were used at the following dilutions: anti-tubulin (1:50,000, Sigma Aldrich) and rabbit anti-pChk1 Ser317 (1:500, Cell Signaling 2344S). For immunofluorescence, B lymphocyte cells were activated and treated with 10 Gy IR and 4 hour recovery prior to being dropped onto slides coated with Cell-Tak (BD). Cells were pre-extracted in 0.5% TX-100 in PBS, fixed in 2% paraformaldehyde in PBS, and permeabilized in 0.5% TX-100 in PBS and incubated in antibody. Primary antibody anti-Rad51 was used at a 1:100 dilution (Santa Cruz H-92) and detected with anti-rabbit Alexa-546 antibody at a 1:200 dilution (Thermo Fisher). Cells were counterstained with DAPI and mounted in Mowiol solution.

### RPA FACS

B cells were treated, fixed, and stained as previously described [39]. Primary antibody anti-rat RPA-32 (Cell Signaling 2208S)

was used at a 1:500 dilution. B cells were suspended in 1 mg/ml propidium iodide and 0.1 mg of RNase A and incubated at 37°C for 30 minutes in the dark. RPA+ cells were measured using a Becton Dickinson FACSCalibur and data were analyzed by FlowJo software.

### Sister chromatid exchange assay

B cells were grown in 10 μM BrdU for 48 hours prior to fixation. Slides were stained with 10 μg/ml Hoechst 33258 in PBS. Stained slides were rinsed in McIlvaine's solution (164 mM Na<sub>2</sub>HPO<sub>4</sub>, 16 mM citric acid, pH 7.0) and then UV irradiated using a transilluminator for 45 minutes on a low setting. Slides were incubated with pre-warmed 1x SSC at 55°C followed by ddH<sub>2</sub>O. Slides were stained in a 1:12 Giemsa stain containing 3% methanol for 30 minutes. Slides were rinsed with ddH<sub>2</sub>O and then dehydrated by placing in a Coplin jar containing xylenes for 15 seconds, air dried, and mounted with Permount.

### U2OS EJ-DR assay

DNA repair assay was performed as previously described using U2OS EJ-DR cells [67]. EJDR reporter cells were plated at 200,000 cells per wells in DMEM with 10% charcoal-stripped FBS (100-119; Gemini), antibiotic/antimycotic and transfected the next day with siRNA using Lipofectamine RNAiMAX (13778-150; invitrogen). 2 days after siRNA transfection, we replaced the media with DMEM containing 10% Tetracycline-free FBS (100-800; Gemini) and antibiotic/antimycotic. Incorporated I-SceI was induced with Shield1 (632189; Clontech) and triamcinolone (T6510; Sigma Aldrich) for 24 hrs. Relative NHEJ and HR activity were assessed 48 hrs after induction by quantification of the percentages of DsRed- and GFP-positive cells on BD FACS Calibur system and analyzed on FlowJo (Tree Star).

### Acknowledgements

This work was funded by NIH R01CA190858 (to SFB). SMM, DSP and JH are supported by the New Jersey Commission on Cancer Research Pre-Doctoral and Post-Doctoral Fellowships. SMM and DSP also received support from the NIH Ruth L. Kirschstein National Research Service Award T32 GM8339.

### Disclosure of potential conflicts of interest

No potential conflicts of interest were disclosed.

### Funding

This work was supported by the National Cancer Institute [grant number R01CA190858]; National Institute of General Medical Sciences [grant number T32 GM8339].

### ORCID

Sarah M. Misenko  <http://orcid.org/0000-0003-2088-5670>  
 Dharm S. Patel  <http://orcid.org/0000-0003-1804-838X>  
 Joonyoung Her  <http://orcid.org/0000-0002-8674-2317>  
 Samuel F. Bunting  <http://orcid.org/0000-0002-4629-496X>

### References

- Lord CJ, Ashworth A. PARP inhibitors: Synthetic lethality in the clinic. *Science*. 2017;355:1152–1158. doi:10.1126/science.aam7344. PMID:28302823
- Bryant HE, Schultz N, Thomas HD, et al. Specific killing of BRCA2-deficient tumours with inhibitors of poly(ADP-ribose) polymerase. *Nature*. 2005;434:913–917. doi:10.1038/nature03443. PMID:15829966
- Farmer H, McCabe N, Lord CJ, et al. Targeting the DNA repair defect in BRCA mutant cells as a therapeutic strategy. *Nature*. 2005;434:917–921. doi:10.1038/nature03445. PMID:15829967
- Lord CJ, Ashworth A. BRCAness revisited. *Nat Rev Cancer*. 2016;16:110–120. doi:10.1038/nrc.2015.21. PMID:26775620
- Turner N, Tutt A, Ashworth A. Hallmarks of 'BRCAness' in sporadic cancers. *Nat Rev Cancer*. 2004;4:814–819. doi:10.1038/nrc1457. PMID:15510162
- Cancer Genome Atlas Research N. Integrated genomic analyses of ovarian carcinoma. *Nature*. 2011;474:609–615. doi:10.1038/nature10166. PMID:21720365
- Kowalczykowski SC. An overview of the molecular mechanisms of recombinational DNA repair. *Cold Spring Harb Perspect Biol*. 2015;7:a016410. PMID:25833843
- Prakash R, Zhang Y, Feng W, et al. Homologous recombination and human health: the roles of BRCA1, BRCA2, and associated proteins. *Cold Spring Harb Perspect Biol*. 2015;7:a016600. doi:10.1101/cshperspect.a016600. PMID:25833843
- Starita LM, Parvin JD. The multiple nuclear functions of BRCA1: transcription, ubiquitination and DNA repair. *Curr Opin Cell Biol*. 2003;15:345–350. doi:10.1016/S0955-0674(03)00042-5. PMID:12787778
- Panier S, Boulton SJ. Double-strand break repair: 53BP1 comes into focus. *Nat Rev Mol Cell Biol*. 2014;15:7–18. doi:10.1038/nrm3719. PMID:24326623
- Botuyan MV, Lee J, Ward IM, et al. Structural basis for the methylation state-specific recognition of histone H4-K20 by 53BP1 and Crb2 in DNA repair. *Cell*. 2006;127:1361–1373. doi:10.1016/j.cell.2006.10.043. PMID:17190600
- Fradet-Turcotte A, Canny MD, Escobedo-Diaz C, et al. 53BP1 is a reader of the DNA-damage-induced H2A Lys 15 ubiquitin mark. *Nature*. 2013;499:50–54. doi:10.1038/nature12318. PMID:23760478
- Bunting SF, Callen E, Kozak ML, et al. BRCA1 functions independently of homologous recombination in DNA interstrand crosslink repair. *Mol Cell*. 2012;46:125–135. doi:10.1016/j.molcel.2012.02.015. PMID:22445484
- Bunting SF, Callen E, Wong N, et al. 53BP1 inhibits homologous recombination in Brca1-deficient cells by blocking resection of DNA breaks. *Cell*. 2010;141:243–254. doi:10.1016/j.cell.2010.03.012. PMID:20362325
- Cao L, Xu X, Bunting SF, et al. A selective requirement for 53BP1 in the biological response to genomic instability induced by Brca1 deficiency. *Mol Cell*. 2009;35:534–541. doi:10.1016/j.molcel.2009.06.037. PMID:19716796
- Mateos-Gomez PA, Gong F, Nair N, et al. Mammalian polymerase theta promotes alternative NHEJ and suppresses recombination. *Nature*. 2015;518:254–257. doi:10.1038/nature14157. PMID:25642960
- Xu G, Chapman JR, Brandsma I, et al. REV7 counteracts DNA double-strand break resection and affects PARP inhibition. *Nature*. 2015;521:541–544. doi:10.1038/nature14328. PMID:25799992
- Daley JM, Sung P. 53BP1, BRCA1, and the choice between recombination and end joining at DNA double-strand breaks. *Mol Cell Biol*. 2014;34:1380–1388. doi:10.1128/MCB.01639-13. PMID:24469398
- Bunting SF, Nussenzweig A. End-joining, translocations and cancer. *Nat Rev Cancer*. 2013;13:443–454. doi:10.1038/nrc3537. PMID:23760025
- Dorsett Y, Zhou Y, Tubbs AT, et al. HCoDES reveals chromosomal DNA end structures with single-nucleotide resolution. *Mol Cell*. 2014;56:808–818. doi:10.1016/j.molcel.2014.10.024. PMID:25435138
- Hakim O, Resch W, Yamane A, et al. DNA damage defines sites of recurrent chromosomal translocations in B lymphocytes. *Nature*. 2012;484:69–74. PMID:22314321

Q6

525

530

535

540

Q7

545

550

555

560

565

570

575

580

585

Q5 515

520

- 590 [22] Aparicio T, Baer R, Gautier J. DNA double-strand break repair pathway choice and cancer. *DNA Repair*. 2014;19:169–175. doi:10.1016/j.dnarep.2014.03.014. PMID:24746645
- [23] Cruz-Garcia A, Lopez-Saavedra A, Huertas P. BRCA1 accelerates CtIP-mediated DNA-end resection. *Cell Rep*. 2014;9:451–459. doi:10.1016/j.celrep.2014.08.076. PMID:25310973
- 595 [24] Polato F, Callen E, Wong N, et al. CtIP-mediated resection is essential for viability and can operate independently of BRCA1. *J Exp Med*. 2014;211:1027–1036. doi:10.1084/jem.20131939. PMID:24842372
- 600 [25] Reczek CR, Szabolcs M, Stark JM, et al. The interaction between CtIP and BRCA1 is not essential for resection-mediated DNA repair or tumor suppression. *J Cell Biol*. 2013;201:693–707. doi:10.1083/jcb.201302145. PMID:23712259
- [26] Zhou Y, Caron P, Legube G, et al. Quantitation of DNA double-strand break resection intermediates in human cells. *Nucleic Acids Res*. 2014;42:e19. doi:10.1093/nar/gkt1309. PMID:24362840
- 605 [27] Patel DS, Misenko SM, Her J, et al. BLM helicase regulates DNA repair by counteracting RAD51 loading at DNA double-strand break sites. *J Cell Biol*. 2017;216:3521–3534. doi:10.1083/jcb.201703144. PMID:28912125
- [28] Gravel S, Chapman JR, Magill C, et al. DNA helicases Sgs1 and BLM promote DNA double-strand break resection. *Genes Dev*. 2008;22:2767–2772. doi:10.1101/gad.503108. PMID:18923075
- 615 [29] Nimonkar AV, Genschel J, Kinoshita E, et al. BLM-DNA2-RPA-MRN and EXO1-BLM-RPA-MRN constitute two DNA end resection machineries for human DNA break repair. *Genes Dev*. 2011;25:350–362. doi:10.1101/gad.2003811. PMID:21325134
- [30] Nimonkar AV, Ozsoy AZ, Genschel J, et al. Human exonuclease 1 and BLM helicase interact to resect DNA and initiate DNA repair. *Proc Natl Acad Sci U S A*. 2008;105:16906–16911. doi:10.1073/pnas.0809380105. PMID:18971343
- 620 [31] Wei K, Clark AB, Wong E, et al. Inactivation of Exonuclease 1 in mice results in DNA mismatch repair defects, increased cancer susceptibility, and male and female sterility. *Genes Dev*. 2003;17:603–614. doi:10.1101/gad.1060603. PMID:12629043
- 625 [32] Chester N, Babbe H, Pinkas J, et al. Mutation of the murine Bloom's syndrome gene produces global genome destabilization. *Mol Cell Biol*. 2006;26:6713–6726. doi:10.1128/MCB.00296-06. PMID:16914751
- 630 [33] Rickert RC, Roes J, Rajewsky K. B lymphocyte-specific, Cre-mediated mutagenesis in mice. *Nucleic Acids Res*. 1997;25:1317–1318. doi:10.1093/nar/25.6.1317. PMID:9092650
- [34] Misenko SM, Bunting SF. Rapid analysis of chromosome aberrations in mouse B lymphocytes by PNA-FISH. *J Vis Exp: JoVE*. 2014;90:e51806. doi:10.3791/51806. PMID:25177909
- 635 **Q8** [35] Bouwman P, Aly A, Escandell JM, et al. 53BP1 loss rescues BRCA1 deficiency and is associated with triple-negative and BRCA-mutated breast cancers. *Nat Struct Mol Biol*. 2010;17:688–695. doi:10.1038/nsmb.1831.
- 640 [36] Simpson LJ, Sale JE. Sister chromatid exchange assay. *Subcell Biochem*. 2006;40:399–403. PMID:17623929
- [37] Chaganti RS, Schonberg S, German J. A manyfold increase in sister chromatid exchanges in Bloom's syndrome lymphocytes. *Proc Natl Acad Sci U S A*. 1974;71:4508–4512. doi:10.1073/pnas.71.11.4508. PMID:4140506
- 645 [38] Tripathi V, Nagarjuna T, Sengupta S. BLM helicase-dependent and -independent roles of 53BP1 during replication stress-mediated homologous recombination. *J Cell Biol*. 2007;178:9–14. doi:10.1083/jcb.200610051. PMID:17591918
- 650 [39] Forment JV, Walker RV, Jackson SP. A high-throughput, flow cytometry-based method to quantify DNA-end resection in mammalian cells. *Cytometry Part A: the journal of the International Society for Analytical Cytology*. 2012;81:922–928. doi:10.1002/cyto.a.22155. PMID:22893507
- 655 [40] Xu B, Kim S, Kastan MB. Involvement of Brca1 in S-phase and G(2)-phase checkpoints after ionizing irradiation. *Mol Cell Biol*. 2001;21:3445–3450. doi:10.1128/MCB.21.10.3445-3450.2001. PMID:11313470
- [41] Marechal A, Zou L. DNA damage sensing by the ATM and ATR kinases. *Cold Spring Harb Perspect Biol*. 2013;5:a012716.
- [42] Saldivar JC, Cortez D, Cimprich KA. The essential kinase ATR: ensuring faithful duplication of a challenging genome. *Nat Rev Mol Cell Biol*. 2017.
- [43] Kousholt AN, Fugger K, Hoffmann S, et al. CtIP-dependent DNA resection is required for DNA damage checkpoint maintenance but not initiation. *J Cell Biol*. 2012;197:869–876. doi:10.1083/jcb.201111065. PMID:22733999
- [44] Yu X, Chen J. DNA damage-induced cell cycle checkpoint control requires CtIP, a phosphorylation-dependent binding partner of BRCA1 C-terminal domains. *Mol Cell Biol*. 2004;24:9478–9486. doi:10.1128/MCB.24.21.9478-9486.2004. PMID:15485915
- [45] Li M, Cole F, Patel DS, et al. 53BP1 ablation rescues genomic instability in mice expressing 'RING-less' BRCA1. *EMBO reports*. 2016;17:1532–1541. doi:10.15252/embr.201642497. PMID:27670884
- 675 [46] Lu H, Shamanna RA, Keijzers G, et al. RECQL4 Promotes DNA end resection in repair of DNA double-strand breaks. *Cell Rep*. 2016;16:161–173. doi:10.1016/j.celrep.2016.05.079. PMID:27320928
- [47] Sturzenegger A, Burdova K, Kanagaraj R, et al. DNA2 cooperates with the WRN and BLM RecQ helicases to mediate long-range DNA end resection in human cells. *J Biol Chem*. 2014;289:27314–27326. doi:10.1074/jbc.M114.578823. PMID:25122754
- [48] Tomimatsu N, Mukherjee B, Deland K, et al. Exo1 plays a major role in DNA end resection in humans and influences double-strand break repair and damage signaling decisions. *DNA repair*. 2012;11:441–448. doi:10.1016/j.dnarep.2012.01.006. PMID:22326273
- [49] Feng Z, Zhang J. A dual role of BRCA1 in two distinct homologous recombination mediated repair in response to replication arrest. *Nucleic Acids Res*. 2012;40:726–738. doi:10.1093/nar/gkr748. PMID:21954437
- 690 [50] Bi J, Huang A, Liu T, et al. Expression of DNA damage checkpoint 53BP1 is correlated with prognosis, cell proliferation and apoptosis in colorectal cancer. *Int J Clin Exp Pathol*. 2015;8:6070–6082. PMID:26261485
- [51] Bowman-Colin C, Xia B, Bunting S, et al. Palb2 synergizes with Trp53 to suppress mammary tumor formation in a model of inherited breast cancer. *Proc Natl Acad Sci U S A*. 2013;110:8632–8637. doi:10.1073/pnas.1305362110. PMID:23657012
- [52] Callen E, Di Virgilio M, Kruhlak MJ, et al. 53BP1 mediates productive and mutagenic DNA repair through distinct phosphoprotein interactions. *Cell*. 2013;153:1266–1280. doi:10.1016/j.cell.2013.05.023. PMID:23727112
- [53] Chapman JR, Barral P, Vannier JB, et al. RIF1 is essential for 53BP1-dependent nonhomologous end joining and suppression of DNA double-strand break resection. *Mol Cell*. 2013;49:858–871. doi:10.1016/j.molcel.2013.01.002. PMID:23333305
- 705 [54] Di Virgilio M, Callen E, Yamane A, et al. Rif1 prevents resection of DNA breaks and promotes immunoglobulin class switching. *Science*. 2013;339:711–715. doi:10.1126/science.1230624. PMID:23306439
- [55] Escribano-Diaz C, Orthwein A, Fradet-Turcotte A, et al. A cell cycle-dependent regulatory circuit composed of 53BP1-RIF1 and BRCA1-CtIP controls DNA repair pathway choice. *Mol Cell*. 2013;49:872–883. doi:10.1016/j.molcel.2013.01.001. PMID:23333306
- 710 [56] Feng L, Fong KW, Wang J, et al. RIF1 counteracts BRCA1-mediated end resection during DNA repair. *J Biol Chem*. 2013;288:11135–11143. doi:10.1074/jbc.M113.457440. PMID:23486525
- [57] Zimmermann M, Lottersberger F, Buonomo SB, et al. 53BP1 regulates DSB repair using Rif1 to control 5' end resection. *Science*. 2013;339:700–704. doi:10.1126/science.1231573. PMID:23306437
- [58] Wang J, Aroumougame A, Lobrich M, et al. PTIP associates with Artemis to dictate DNA repair pathway choice. *Genes Dev*. 2014;28:2693–2698. doi:10.1101/gad.252478.114. PMID:25512557
- [59] Hansen RK, Mund A, Poulsen SL, et al. SCAI promotes DNA double-strand break repair in distinct chromosomal contexts. *Nat Cell Biol*. 2016;18:1357–1366. doi:10.1038/ncb3436. PMID:27820601
- 725 [60] Noon AT, Shibata A, Rief N, et al. 53BP1-dependent robust localized KAP-1 phosphorylation is essential for heterochromatic DNA double-strand break repair. *Nat Cell Biol*. 2010;12:177–184. doi:10.1038/ncb2017. PMID:20081839

- 730 [61] Ochs F, Somyajit K, Altmeyer M, et al. 53BP1 fosters fidelity of homology-directed DNA repair. *Nat Struct Mol Biol.* **2016**;23:714–721. doi:10.1038/nsmb.3251.
- [62] Bothmer A, Robbiani DF, Feldhahn N, et al. 53BP1 regulates DNA resection and the choice between classical and alternative end joining during class switch recombination. *J Exp Med.* **2010**;207:855–865. doi:10.1084/jem.20100244. PMID: 20368578
- 735 [63] Difilippantonio S, Gapud E, Wong N, et al. 53BP1 facilitates long-range DNA end-joining during V(D)J recombination. *Nature.* **2008**;456:529–533. doi:10.1038/nature07476. PMID: 18931658
- 740 [64] Dimitrova N, Chen YC, Spector DL, et al. 53BP1 promotes non-homologous end joining of telomeres by increasing chromatin mobility. *Nature.* **2008**;456:524–528. doi:10.1038/nature07433. PMID: 18931659
- [65] Lottersberger F, Karssemeijer RA, Dimitrova N, et al. 53BP1 and the LINC complex promote microtubule-dependent DSB mobility and DNA repair. *Cell.* **2015**;163:880–893. doi:10.1016/j.cell.2015.09.057. PMID: 26544937
- [66] Densham RM, Garvin AJ, Stone HR, et al. Human BRCA1-BARD1 ubiquitin ligase activity counteracts chromatin barriers to DNA resection. *Nat Struct Mol Biol.* **2016**;23:647–655. doi:10.1038/nsmb.3236. 750
- [67] Bindra RS, Goglia AG, Jasin M, et al. Development of an assay to measure mutagenic non-homologous end-joining repair activity in mammalian cells. *Nucleic Acids Res.* **2013**;41:e115. doi:10.1093/nar/gkt255. PMID: 23585275 755
